# Supplementary material for: Nanomaterial Characterization in Complex Media—Guidance and Application
Source: MDPI journal article supplement (doi:10.3390/nano13050922), 2023-03-02
Supplement: s1 [file s1]

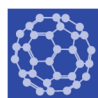

## Supplementary Materials

# Nanomaterial Characterization in Complex Media—Guidance and Application

Yves Uwe Hachenberger <sup>1,†</sup>, Daniel Rosenkranz <sup>2,†</sup>, Charlotte Kromer <sup>1</sup>, Benjamin Christoph Krause <sup>1,†</sup>, Nadine Dreiaek <sup>1</sup>, Fabian Lukas Kriegel <sup>1,†</sup>, Ekaterina Koz'menko <sup>1,†</sup>, Harald Jungnickel <sup>1</sup>, Jutta Tentschert <sup>1</sup>, Frank Stefan Bierkandt <sup>1,\*</sup>, Peter Laux <sup>1,\*</sup>, Ulrich Panne <sup>3</sup> and Andreas Luch <sup>1</sup>

<sup>1</sup> Department of Chemical & Product Safety, German Federal Institute for Risk Assessment (BfR), Max-Dohrn-Strasse 8-10, 10589 Berlin, Germany

<sup>2</sup> Institute for Clinical Chemistry and Laboratory Medicine, Klinikum Oldenburg AöR, Rahel-Straus-Straße 10, 26133 Oldenburg, Germany

<sup>3</sup> Federal Institute for Materials Research and Testing (BAM), Richard-Willstätter-Strasse 11, 12489 Berlin, Germany

\* Correspondence: frank.bierkandt@bfr.bund.de (F.S.B.); peter.laux@bfr.bund.de (P.L.)

† Former Employee of BfR or/and BAM.

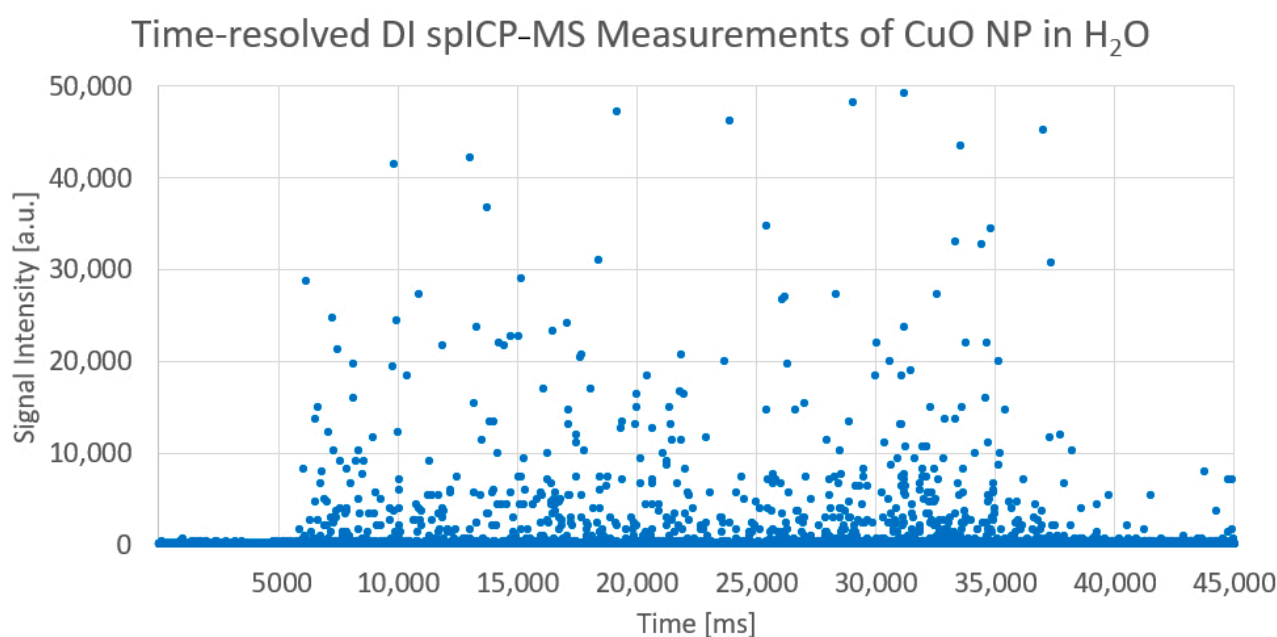

**Figure S1.** Time-resolved DI spICP-MS analysis of CuO NP dispersions (1 µg/L) in aqueous media.

### Time-resolved DI spICP-MS Measurements of CuO NP in BSA

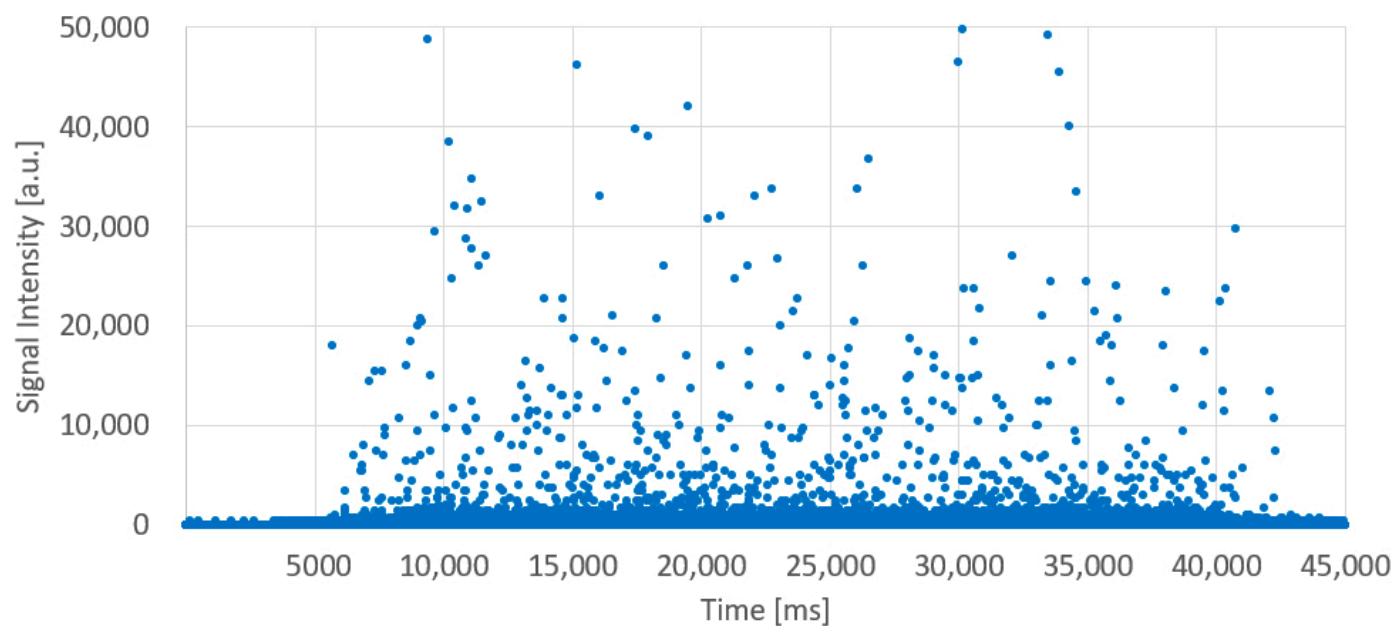

**Figure S2.** Time-resolved DI spICP-MS analysis of CuO NP dispersions (1  $\mu\text{g/L}$ ) in BSA.

### Time-resolved DI spICP-MS Measurements of CuO NP in $\text{NaHCO}_3$

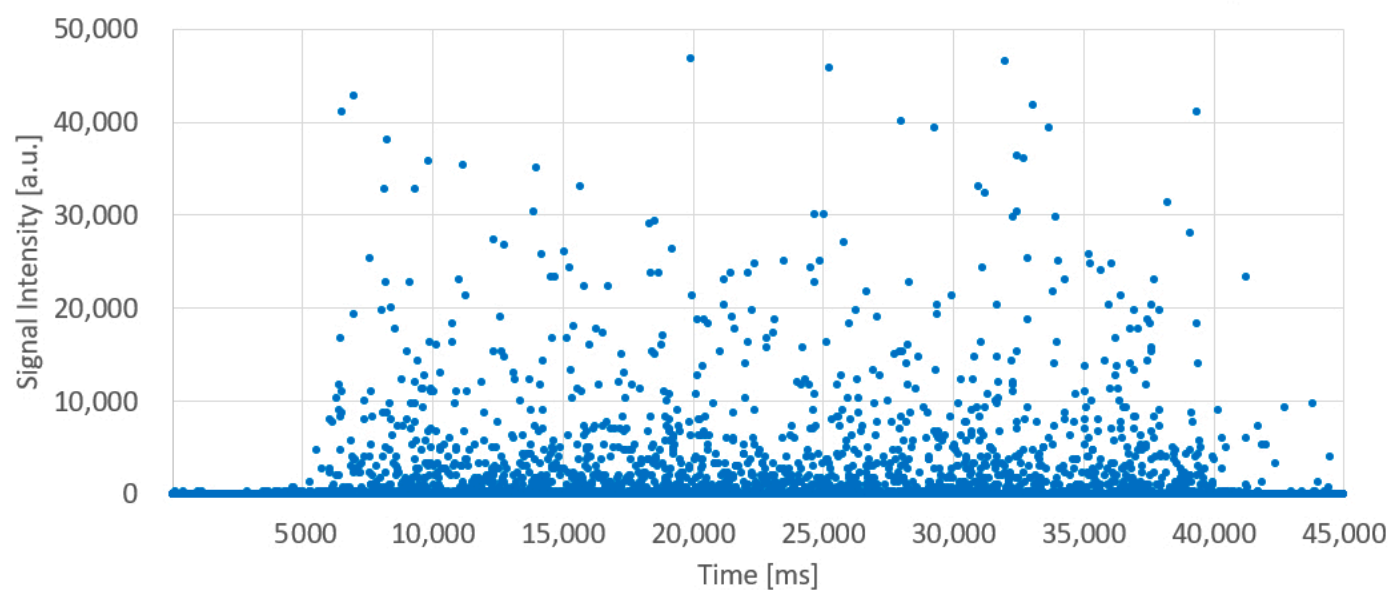

**Figure S3.** Time-resolved DI spICP-MS analysis of CuO NP dispersions (1  $\mu\text{g/L}$ ) in  $\text{NaHCO}_3$ .

### Time-resolved DI spICP-MS Measurements of CuO NP in ALF

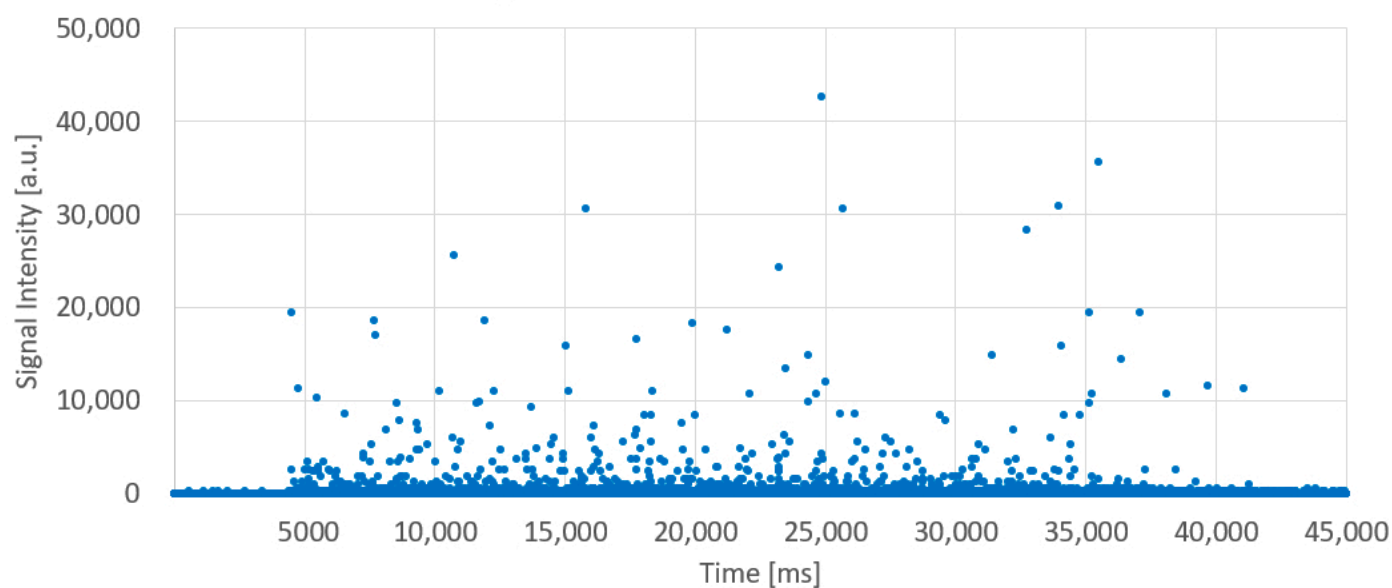

**Figure S4.** Time-resolved DI spICP-MS analysis of CuO NP dispersions (1  $\mu\text{g/L}$ ) in ALF.

### Time-resolved DI spICP-MS Measurements of CuO NP in GS

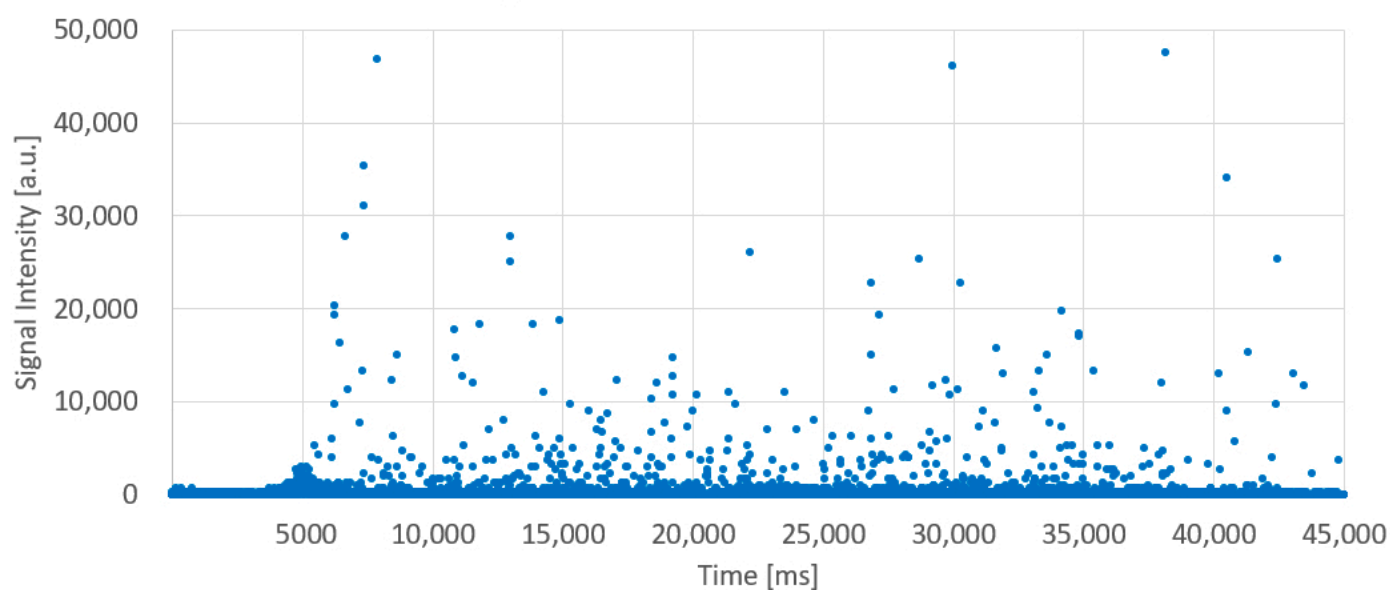

**Figure S5.** Time-resolved DI spICP-MS analysis of CuO NP dispersions (1  $\mu\text{g/L}$ ) in GS.

### Time-resolved DI spICP-MS Measurements of CuO NP in EGS

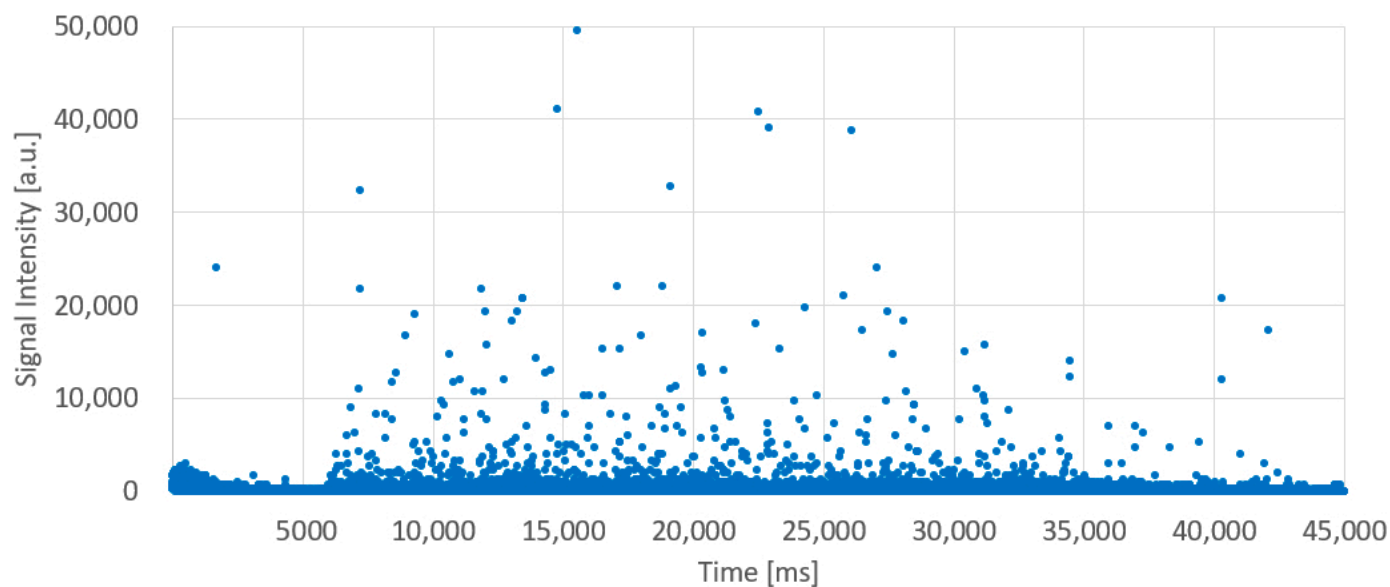

**Figure S6.** Time-resolved DI spICP-MS analysis of CuO NP dispersions (1  $\mu\text{g/L}$ ) in EGS.

### Time-resolved DI spICP-MS Measurements of CuO NP in RPMI

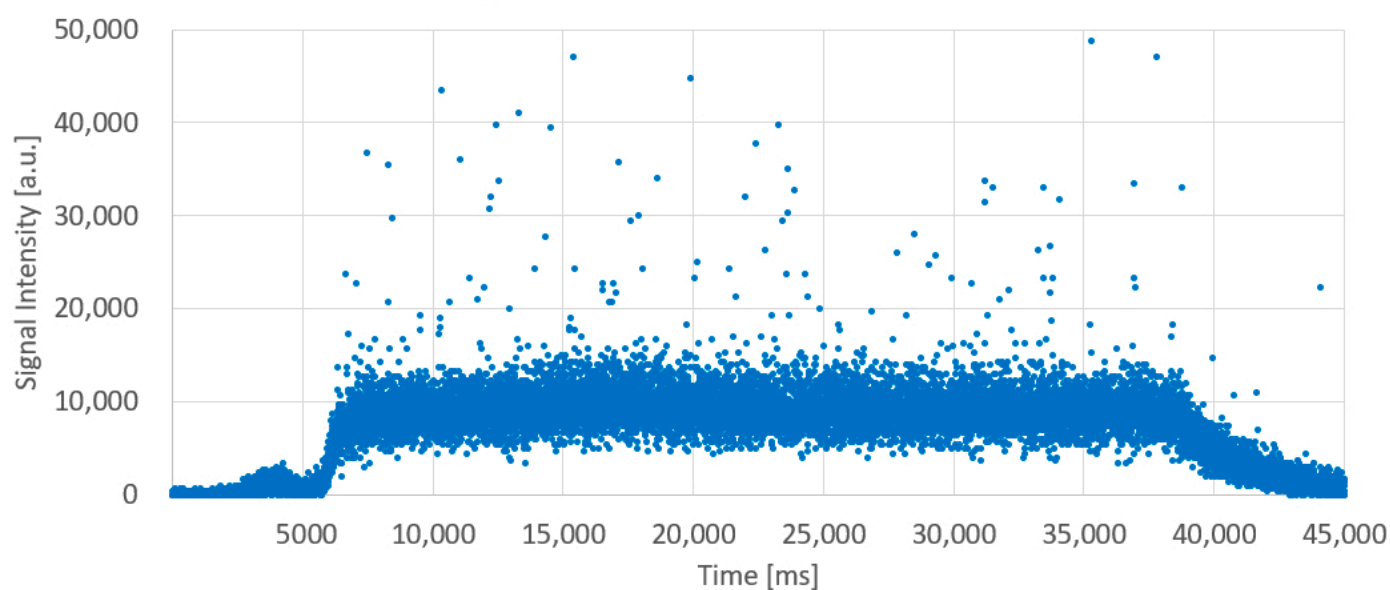

**Figure S7.** Time-resolved DI spICP-MS analysis of CuO NP dispersions (1  $\mu\text{g/L}$ ) in RPMI.
